# Supplementary material
Source: PubMed Central journal article supplement (PMC10031765)

Supplementary figure 1

A

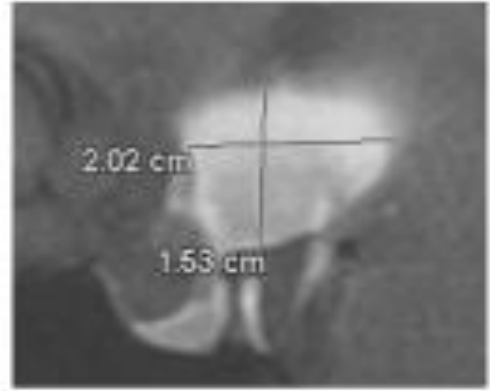

B

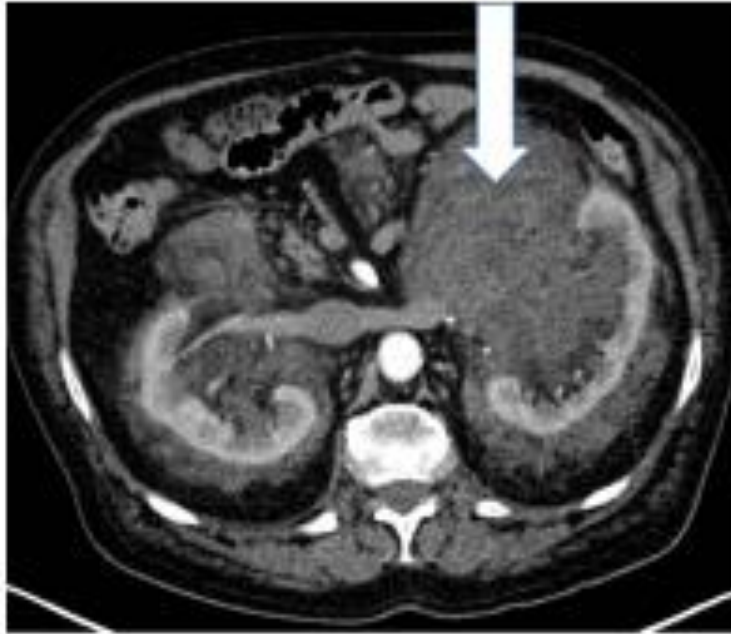

C

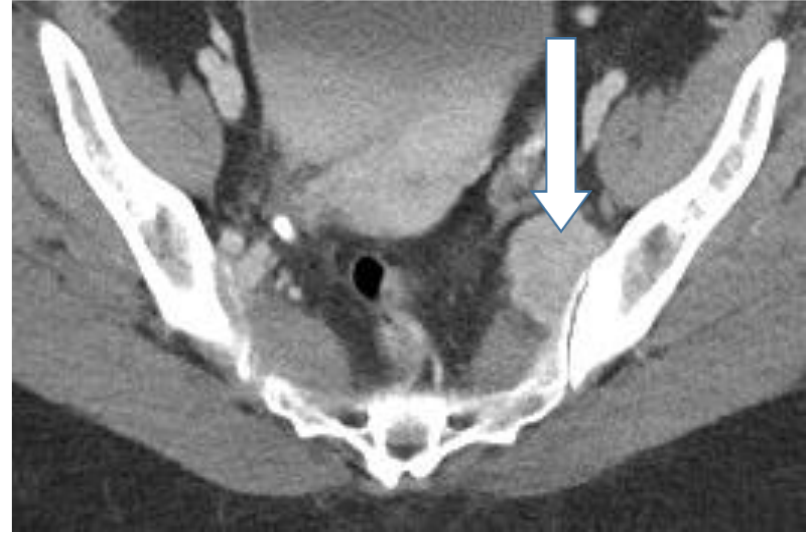

Supplement: NIHMS1785578-supplement-Supplentary_Figure_1.pdf [file NIHMS1785578-supplement-Supplentary_Figure_1.pdf]
